# Supplementary material for: Ligand effects on the structure, mixed-valence sites and magnetic properties of novel pentanickel string complexes
Source: Royal Society of Chemistry journal article supplement (doi:10.1039/c9dt01363f), 2019-01-01
Supplement: c9dt01363f1.pdf [file c9dt01363f1.pdf]

***Electronic Supplementary Information for***

**Ligand Effects on the Structure, Mixed-valence Sites and Magnetic  
Properties of Novel Pentanickel String Complexes**

Cheng-Chang Chiu,<sup>a</sup> Gene-Hsiang Lee,<sup>a</sup> Tien-Sung Lin,<sup>a</sup>  
and Shie-Ming Peng<sup>\*a,b</sup>

---

[a] Department of Chemistry, National Taiwan University, No. 1, Sec. 4,  
Roosevelt Rd., 10617 Taipei, Taiwan.

E-mail: [smpeng@ntu.edu.tw](mailto:smpeng@ntu.edu.tw)

[b] Institute of Chemistry, Academia Sinica, 128 Academia Road, Section 2,  
Nankang, Taipei, Taiwan.

## Content

1. Synthetic route of the precursors (**P1** and **P2**), ligands (**L1–L4**) and complexes **1–8**.  
(**Scheme S1-S3**)
2. Infrared spectroscopic data of complexes  $[\text{Ni}_5]^{9+}$  (**1**, **3**, **5** and **7**)  
(**Figure S1-S4**)
3. Mass spectrometry for complexes **1-8**.  
(**Figure S5-S12**)
4. NMR measurements for complexes **4**, **6** and **8**.  
(**Figure S13-S15**)
5. UV-Vis and Near-IR spectra.  
(**Figure S16-S19; Table S1**)
6. Plot of  $\chi_M$  vs.  $T$  and  $\mu_{\text{eff}}$  vs.  $T$  for complexes **1**, **3**, **5** and **7**.  
(**Figure S20**)
7. CV measurement for complexes **2**, **4** and **8** in  $\text{CH}_2\text{Cl}_2$  containing 0.1 M TBAP with a scan rate of  $100 \text{ mV}\cdot\text{s}^{-1}$ .  
(**Figure S21**)
8. EPR spectra for complexes **1–3** at 4 K.  
**Figure S22.** The experimental and simulated EPR spectra at 4 K, (a) complex **1** and (b) complex **3**, experiment (in blue); simulation (in red).  
**Figure S23.** The experimental EPR spectra of complex **2** at 4, 10 and 25 K, respectively.
9. Crystal data for complexes **1–8**.  
(**Table S2 and S3**).

# 1. Synthetic route of the precursors (**P1** and **P2**), ligands (**L1–L4**) and complexes **1–8**

The four main ligands H<sub>2</sub>Tspnda, H<sub>2</sub>Tsphnda, H<sub>2</sub>Mspnda and H<sub>2</sub>Msphnda were synthesized on the basis of palladium-catalyzed Buchwald cross-coupling of halides and amines.<sup>1</sup> Complexes **1** and **2** are synthesized by using H<sub>2</sub>Tspnda as ligand; complexes **3** and **4** are synthesized by using H<sub>2</sub>Tsphnda as ligand; Complexes **5** and **6** are synthesized by using H<sub>2</sub>Mspnda as ligand and Complexes **7** and **8** are synthesized by using H<sub>2</sub>Mspnda as ligand. The detail synthetic routes are described in Scheme S1–S3. The EMAC **1–8** were synthesized by the reaction of Ni(OAc)<sub>2</sub>·4H<sub>2</sub>O with ligands at high temperature (220 °C) by employing naphthalene as solvent and [FeCp<sub>2</sub>](PF<sub>6</sub>) as an oxidizing reagent to generate EMAC **1–8**. The KPF<sub>6</sub> and NaCF<sub>3</sub>SO<sub>3</sub> are the anion source to balance the charge of the EMACs. In the course of the reaction, the complexes might generate four different configurations by head-tail counting, which are (4,0), (3,1), (2,2)-*cis* and (2,2)-*trans* forms. Interestingly, the structure prefer to be presented in (2,2)-*trans* forms. It is mainly due to the configuration is more stable and the steric hindrance effect. In addition, we perform the fine-tune H<sub>2</sub>Tspnda and H<sub>2</sub>Mspnda ligands to increase the solubility of the complexes. The solubility of the phenyl-substituted ligands (H<sub>2</sub>Tsphnda and H<sub>2</sub>Msphnda) is obviously better than the H<sub>2</sub>Tspnda and H<sub>2</sub>Mspnda ligands.

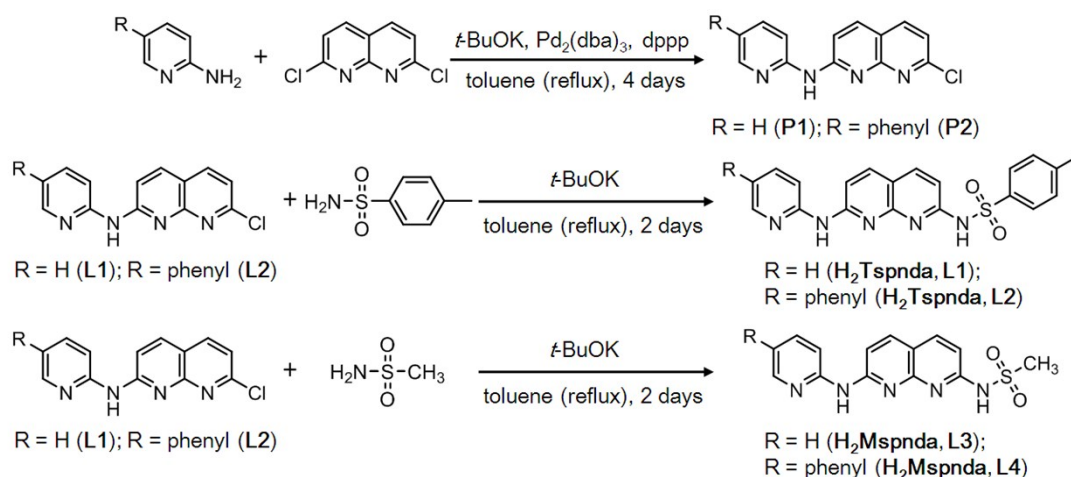

**Scheme S1.** Synthetic routes of the precursors (**P1** and **P2**) and the ligands (**L1–L4**).



## 2. Infrared spectroscopic data of complexes $[\text{Ni}_5]^{9+}$ (**1**, **3**, **5** and **7**)

For complexes **1**, **3**, **5** and **7**, the infrared spectra shows that the data were recorded on a Nicolet iS5 Fourier Transform IR spectrometer in the range of  $500\text{--}4000\text{ cm}^{-1}$  and using KBr pellets, and the  $\text{PF}_6^-$  anion peaks are detected at around  $840\text{ cm}^{-1}$  for these complexes.

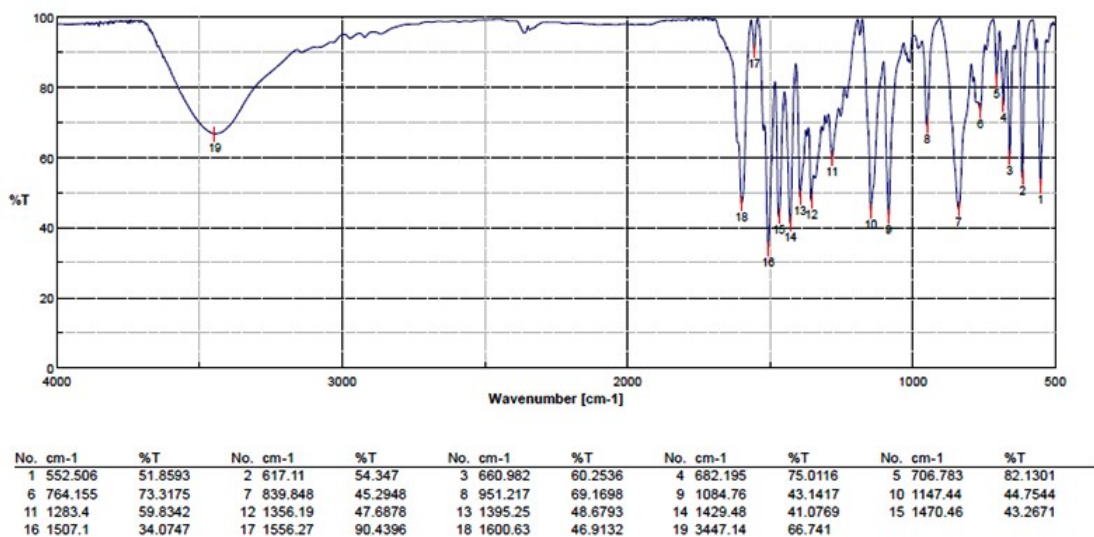

**Figure S1.** IR spectroscopic data of complex **1**, the  $\text{PF}_6^-$  anion peak at  $840\text{ cm}^{-1}$ .

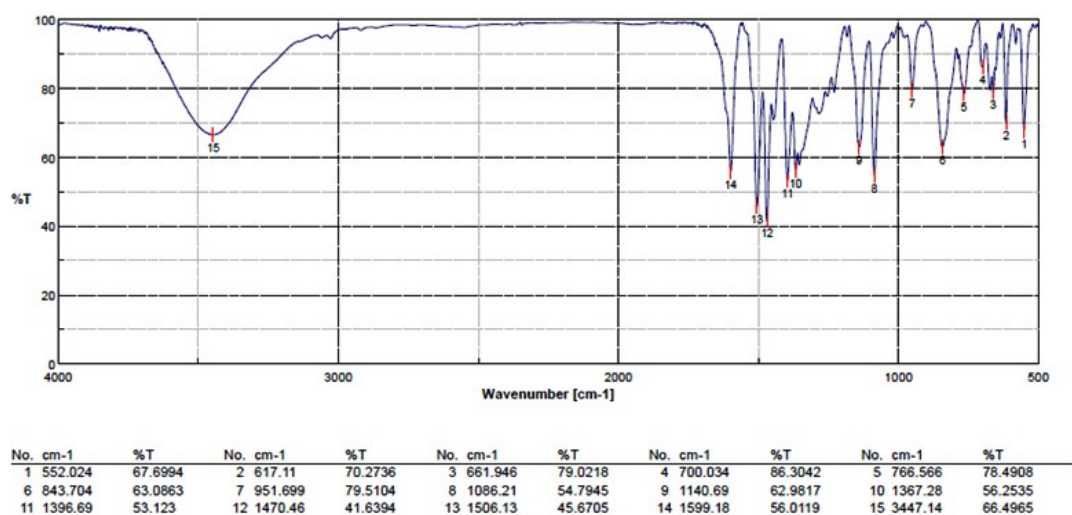

**Figure S2.** IR spectroscopic data of complex **3**, the  $\text{PF}_6^-$  anion peak at  $844\text{ cm}^{-1}$ .

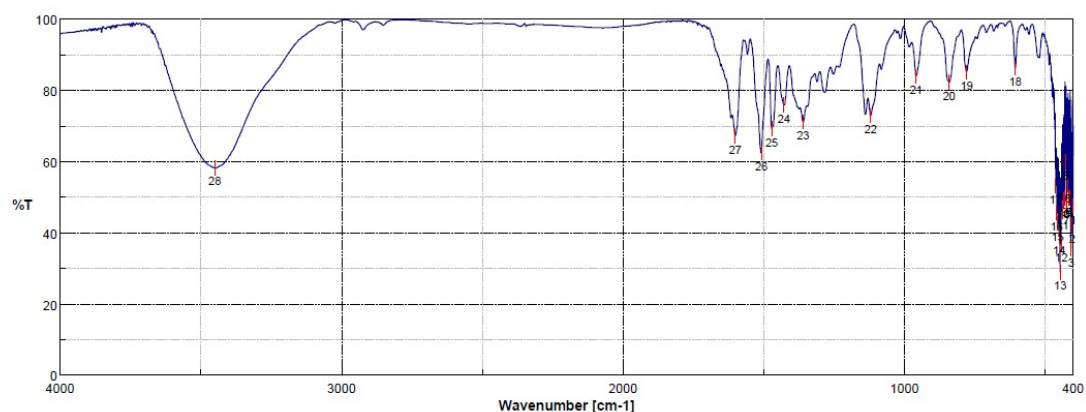

Date/Time 2016/12/6 0:59 下午  
 Operator  
 File Name NIMspnda(PF6)  
 Sample Name NIMspnda(PF6)  
 Comment

| No. | cm-1    | %T      |
|-----|---------|---------|-----|---------|---------|-----|---------|---------|-----|---------|---------|-----|---------|---------|
| 1   | 401.121 | 47.5312 | 2   | 404.978 | 42.2459 | 3   | 408.835 | 35.6206 | 4   | 412.692 | 49.8099 | 5   | 416.549 | 49.8276 |
| 6   | 420.406 | 53.5889 | 7   | 424.263 | 47.5756 | 8   | 428.12  | 59.9941 | 9   | 431.977 | 49.7815 | 10  | 435.834 | 49.2481 |
| 11  | 439.69  | 46.1338 | 12  | 443.547 | 36.8861 | 13  | 447.404 | 28.9661 | 14  | 451.261 | 39.0696 | 15  | 455.118 | 42.6771 |
| 16  | 458.975 | 45.5989 | 17  | 462.832 | 53.2325 | 18  | 606.503 | 86.2895 | 19  | 779.583 | 85.2611 | 20  | 840.812 | 82.3578 |
| 21  | 958.93  | 84.0436 | 22  | 1120.44 | 72.944  | 23  | 1360.05 | 71.2231 | 24  | 1428.03 | 76.0376 | 25  | 1471.9  | 69.2491 |
| 26  | 1509.51 | 62.5037 | 27  | 1601.59 | 67.2956 | 28  | 3450.99 | 58.3051 |     |         |         |     |         |         |

**Figure S3.** IR spectroscopic data of complex **5**, the  $\text{PF}_6^-$  anion peak at  $841 \text{ cm}^{-1}$ .

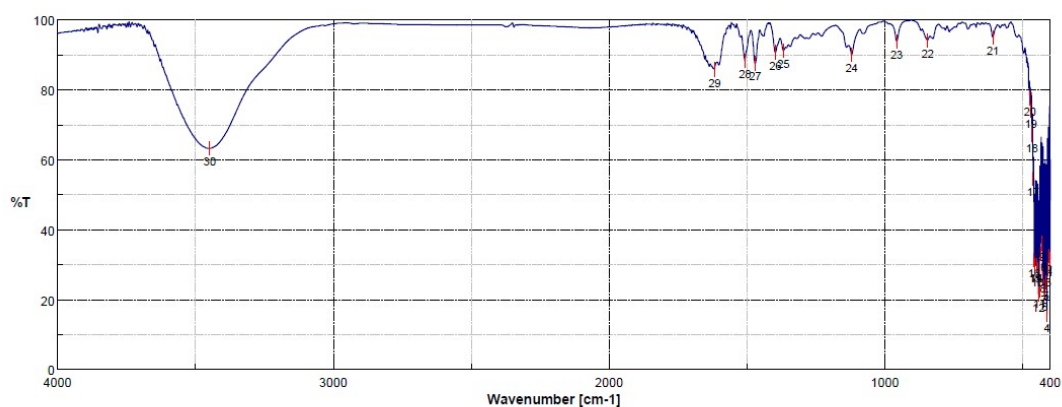

Date/Time 2016/12/6 1:05 下午  
 Operator  
 File Name NIMsphnda(PF6)  
 Sample Name NIMsphnda(PF6)  
 Comment

| No. | cm-1    | %T      |
|-----|---------|---------|-----|---------|---------|-----|---------|---------|-----|---------|---------|-----|---------|---------|
| 1   | 401.121 | 31.6451 | 2   | 404.978 | 32.501  | 3   | 408.835 | 28.7875 | 4   | 412.692 | 15.6108 | 5   | 416.549 | 25.0894 |
| 6   | 420.406 | 21.8245 | 7   | 424.263 | 23.7453 | 8   | 428.12  | 26.9824 | 9   | 431.977 | 36.2134 | 10  | 435.834 | 33.1413 |
| 11  | 439.69  | 22.8201 | 12  | 443.547 | 21.5931 | 13  | 447.404 | 28.6341 | 14  | 451.261 | 29.9695 | 15  | 455.118 | 29.843  |
| 16  | 458.975 | 31.3647 | 17  | 462.832 | 54.7198 | 18  | 466.689 | 67.3451 | 19  | 470.546 | 74.2169 | 20  | 474.403 | 77.7097 |
| 21  | 608.914 | 95.0818 | 22  | 845.633 | 94.2627 | 23  | 957.002 | 93.9769 | 24  | 1120.44 | 90.1421 | 25  | 1368.25 | 91.299  |
| 26  | 1397.17 | 90.82   | 27  | 1470.94 | 87.6319 | 28  | 1507.58 | 88.3766 | 29  | 1617.98 | 85.94   | 30  | 3448.1  | 63.2658 |

**Figure S4.** IR spectroscopic data of complex **7**, the  $\text{PF}_6^-$  anion peak at  $846 \text{ cm}^{-1}$ .



### 3. Mass spectrometry for complexes 1–8

MALDI-mass spectra were obtained with a Bruker, New ultrafleXtremet™ for 1–8. The peaks show that the distributions of experiment results are consistent with the simulation data for these four complexes.

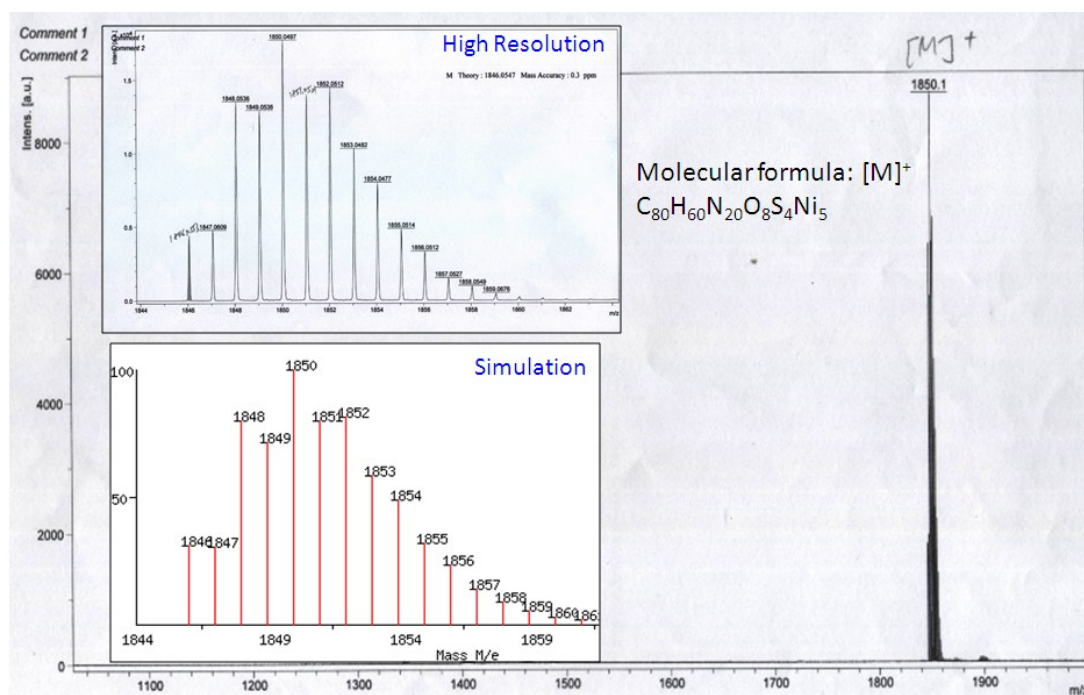

Figure S5. Mass spectrometric data of complex 1.

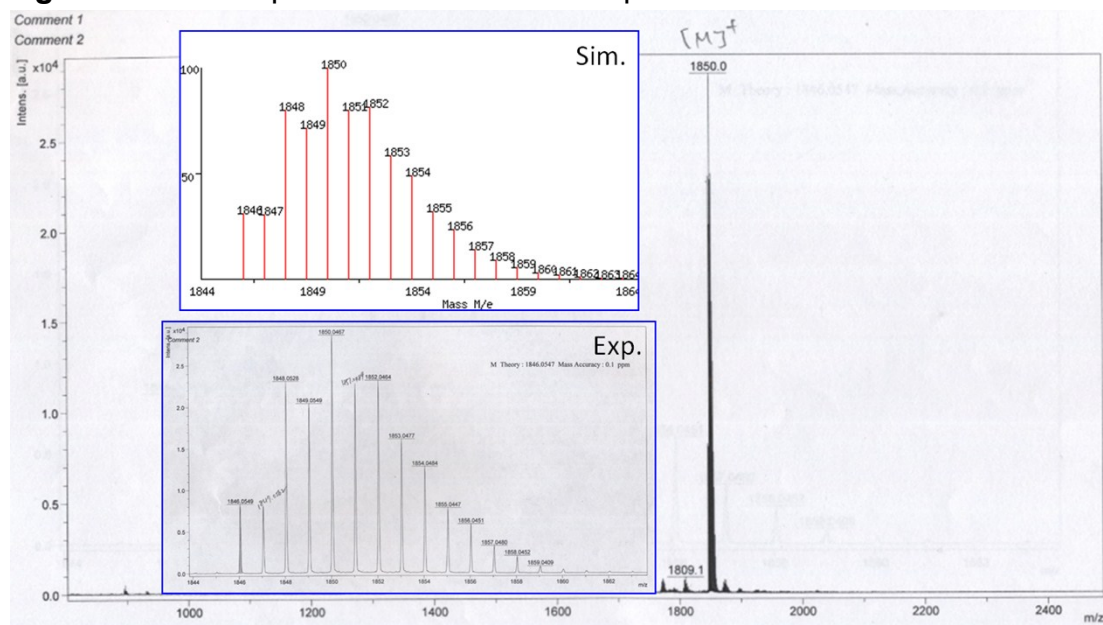

Figure S6. Mass spectrometric data of complex 2.

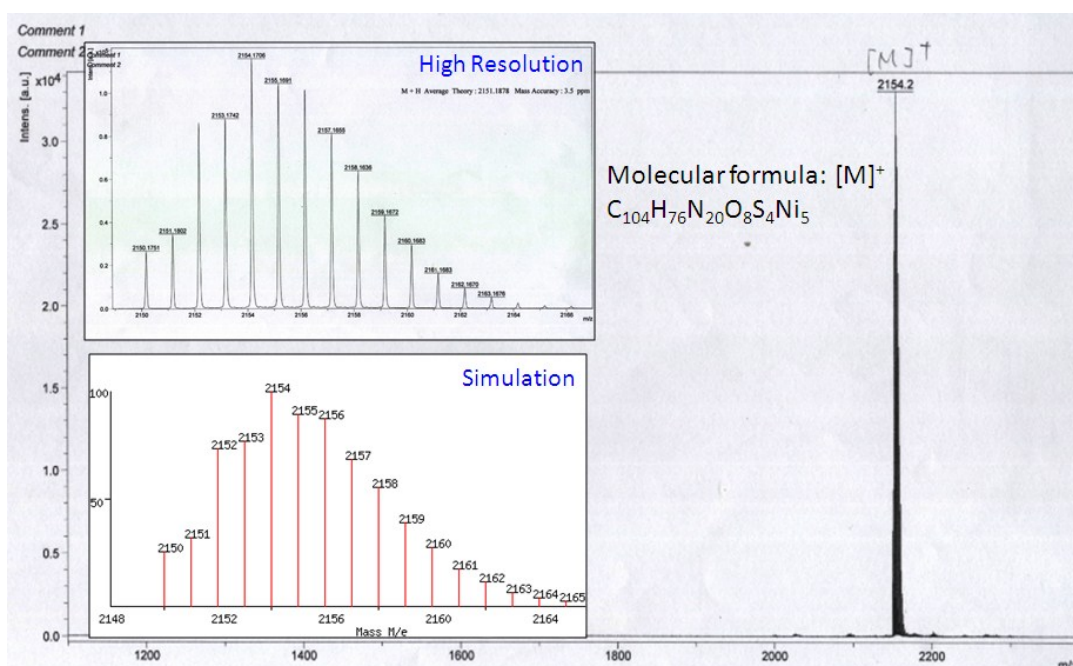

Figure S7. Mass spectrometric data of complex 3.

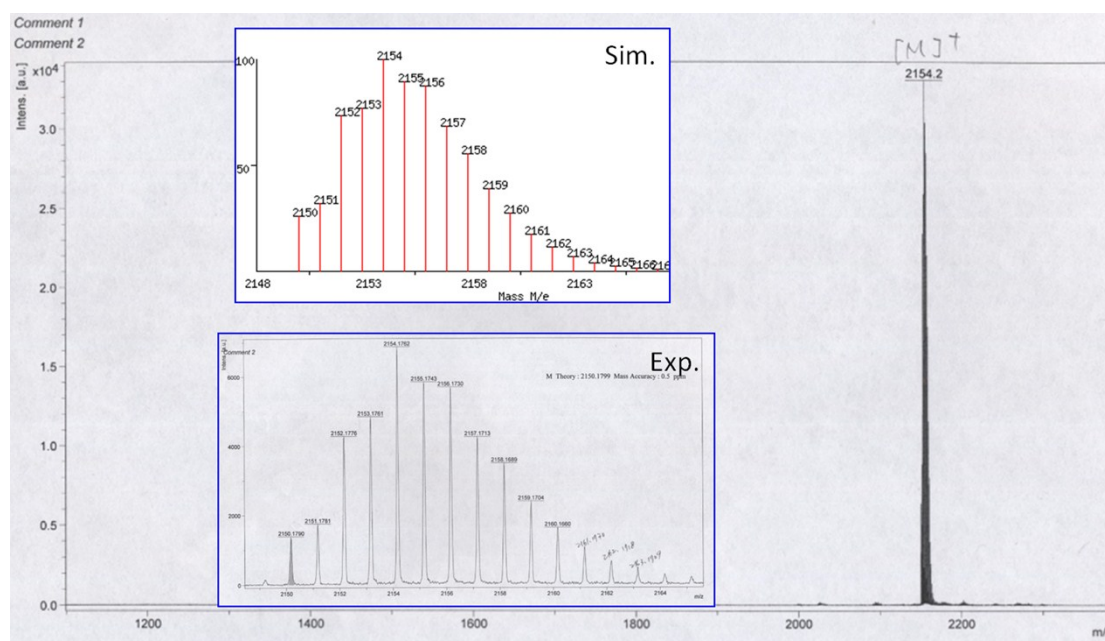

Figure S8. Mass spectrometric data of complex 4.



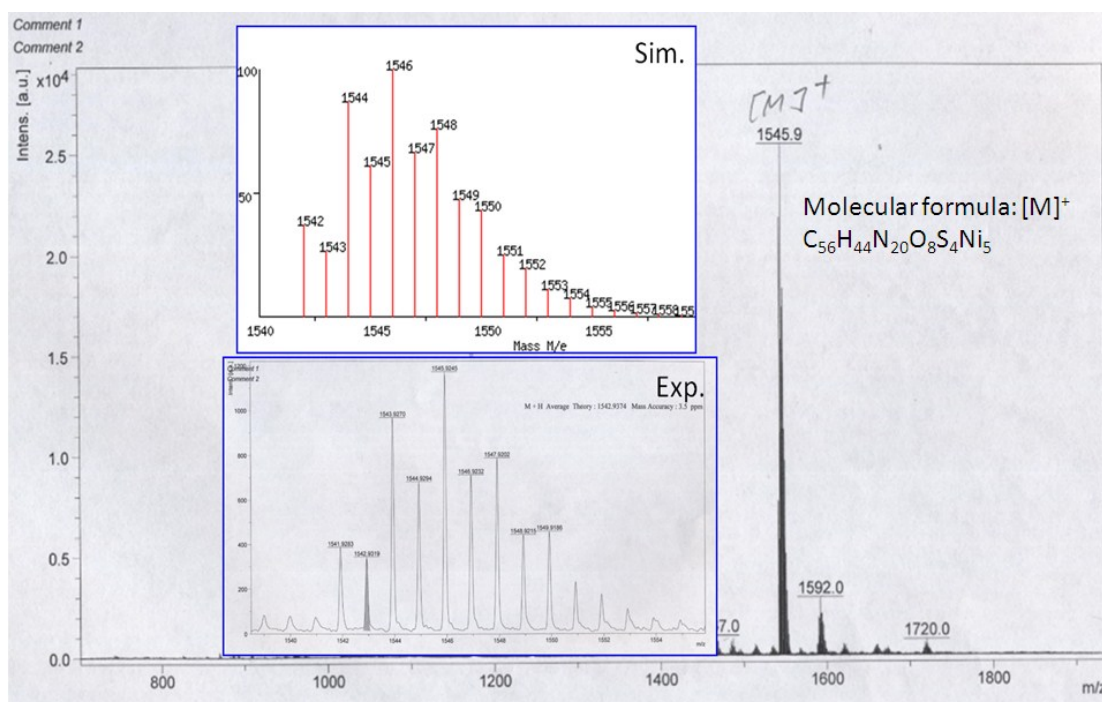

Figure S9. Mass spectrometric data of complex 5.

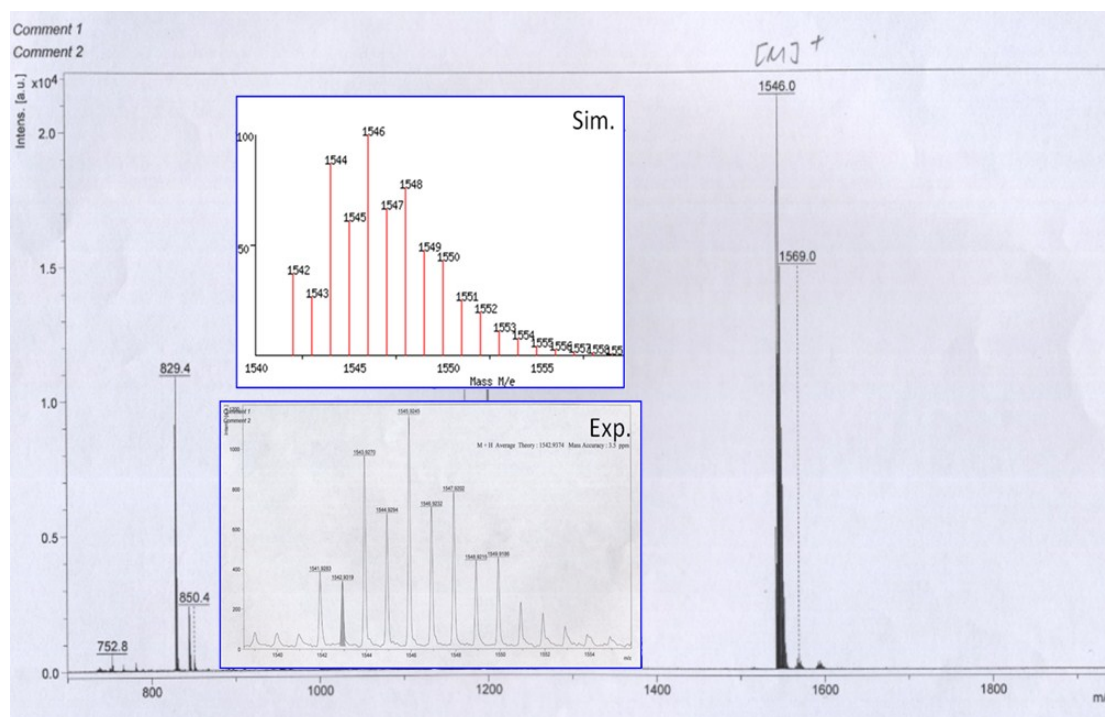

Figure S10. Mass spectrometric data of complex 6.

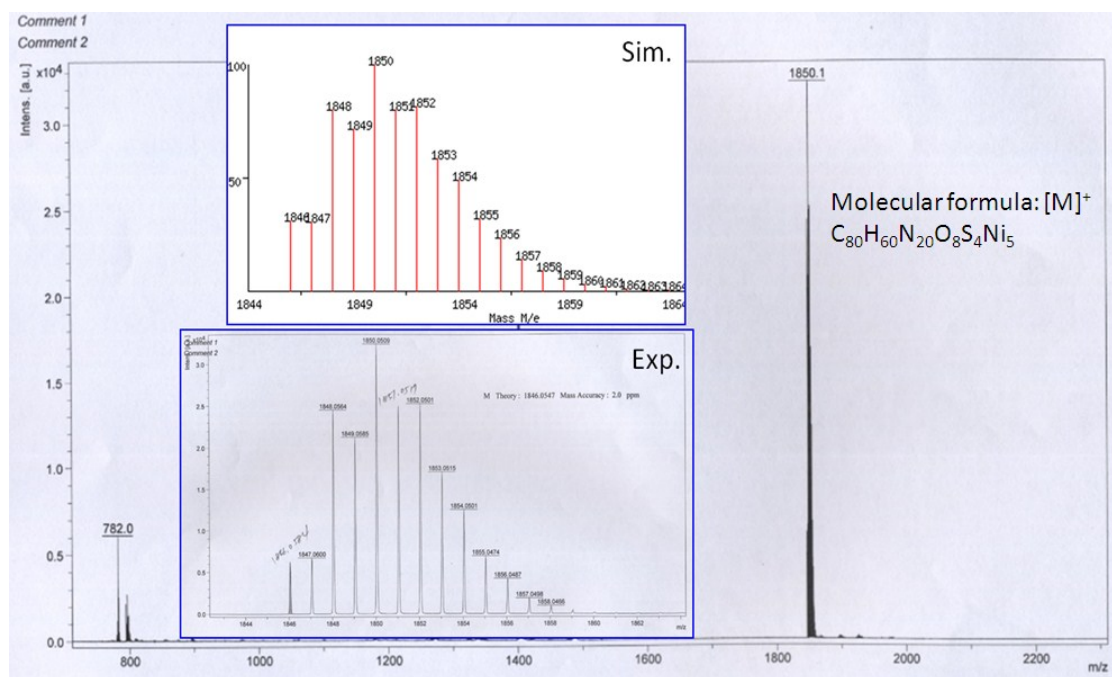

Figure S11. Mass spectrometric data of complex 7.

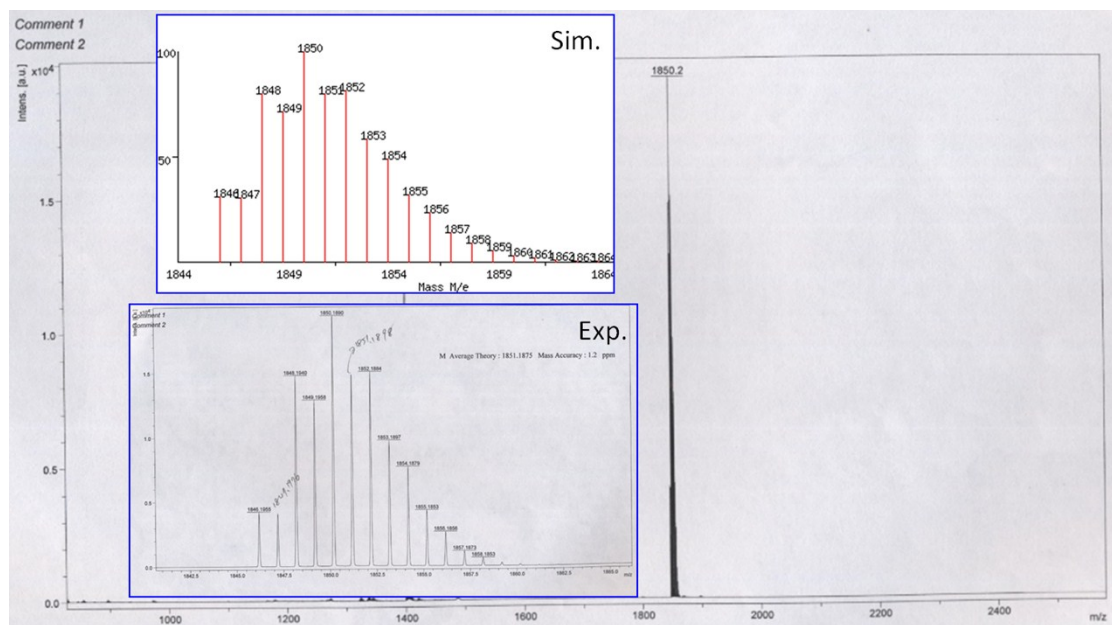

Figure S12. Mass spectrometric data of complex 8.

#### 4. NMR measurements for complexes **4**, **6** and **8**

$^1\text{H}$  NMR measurement of **4**, **6** and **8** were recorded in  $[\text{d}_6]$ -DMSO with a Bruker DPX 400 MHz spectrometer. These complexes show that all of the peaks are shown at low-field, and provide that complexes **4**, **6** and **8** have diamagnetic property.

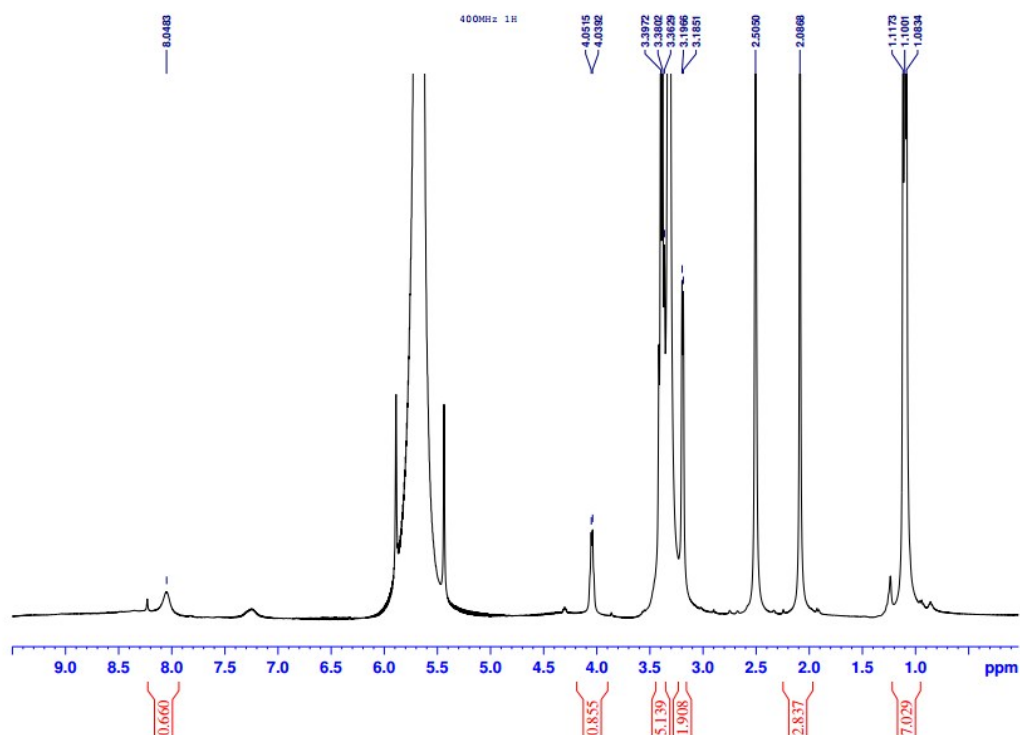

**Figure S13.**  $^1\text{H}$  NMR spectrum of complex **4** in  $[\text{d}_6]$ -DMSO at 400 MHz.

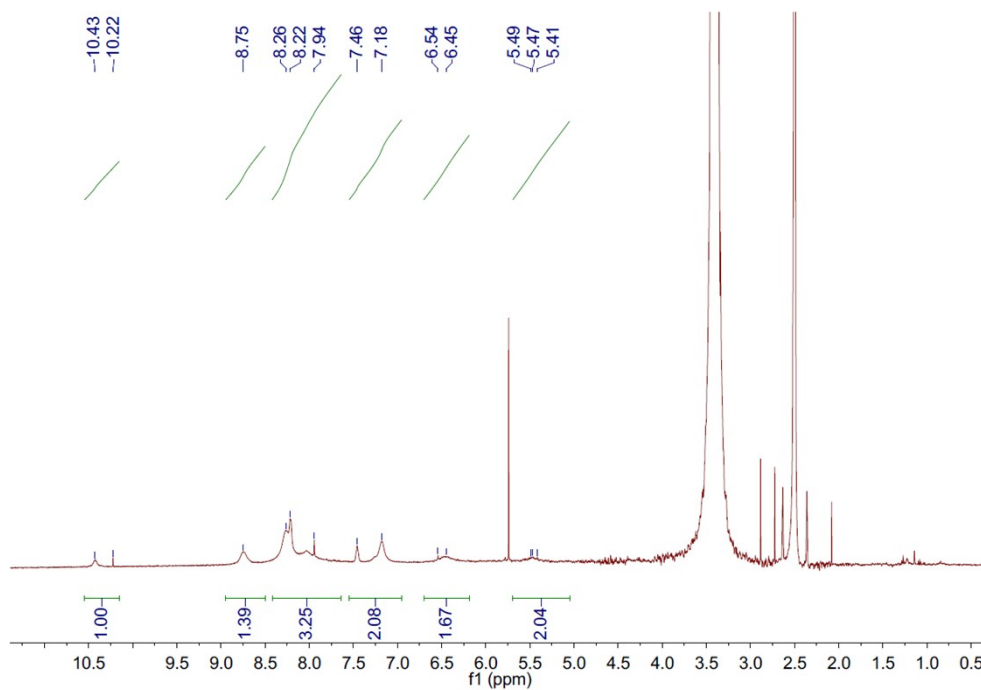

**Figure S14.** <sup>1</sup>H NMR spectrum of complex **6** in [d<sub>6</sub>]-DMSO at 400 MHz.

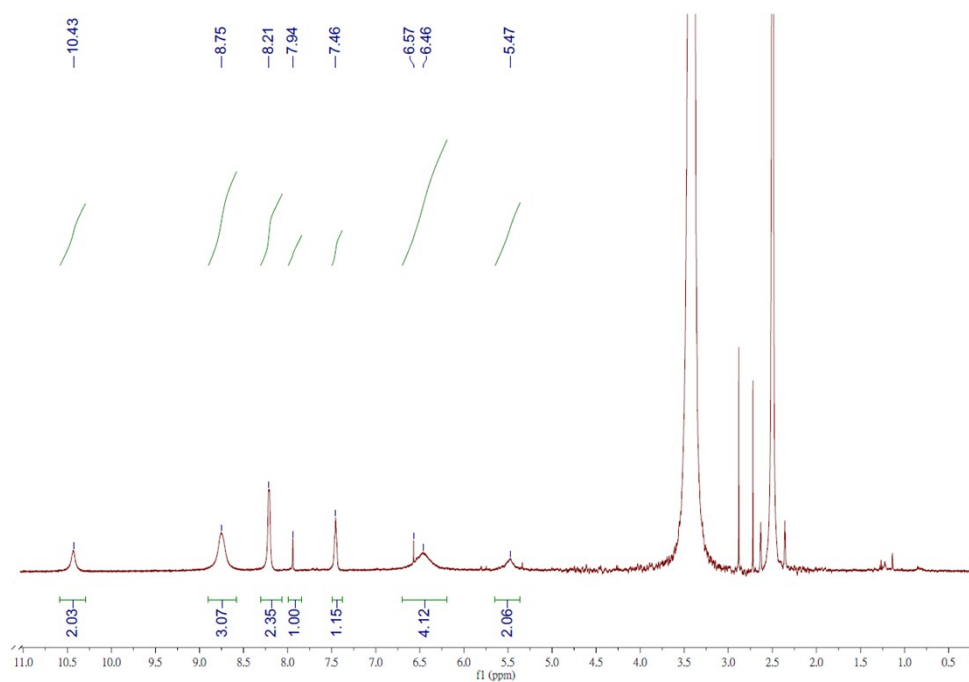

**Figure S15.** <sup>1</sup>H NMR spectrum of complex **8** in [d<sub>6</sub>]-DMSO at 400 MHz.

## 5. UV-Vis and Near-IR spectra

UV-Vis absorption spectra were recorded by a Jasco V-570 spectrometer. There are absorption peaks of d-d transition at around 650 nm for complexes **1–4**, and at about 633 nm for **7** and **8**. The signals at around 400 nm for these complexes are assigned to the metal-to-ligand charge transfer (MLCT) transition. Complexes **5** and **6** is slightly soluble in DCM, thus, the absorbance is very low when we performed the UV-vis measurement. (see Figure S16-S18).

In addition, we performed the near-IR spectra of complex **1**, **3**, **5** and **7** (see Figure S19, Table S1). The spectra of these four complexes in DMF show two broad bands, one centered at 1431 nm and the other at 1556 nm. These two broad bands are assigned to intervalence charge transfer (IVCT) transition, characteristic of mixed-valence complexes.<sup>2</sup>

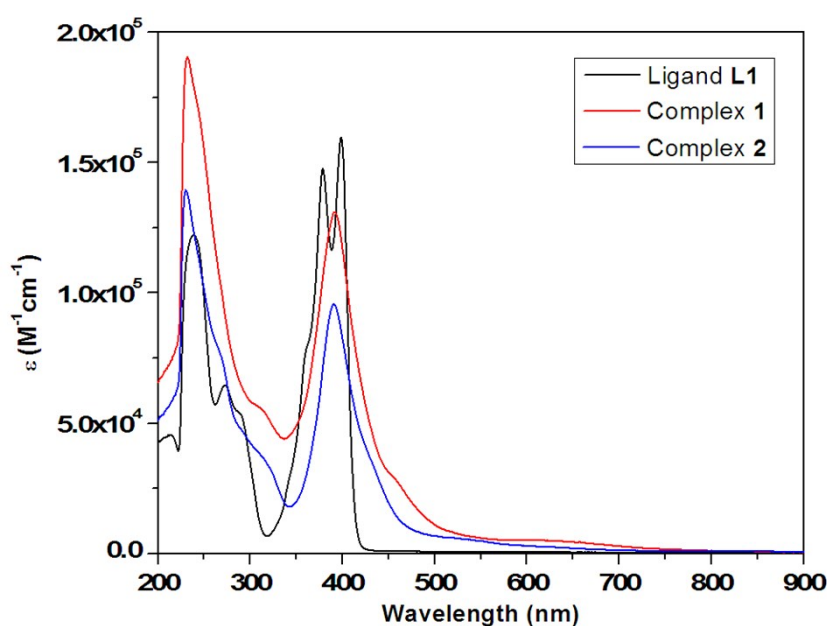

**Figure S16.** UV-Vis spectra of complexes **1** and **2**, compared with ligand (**L1**) in  $CH_2Cl_2$  ( $1.5 \times 10^{-5}$  M).

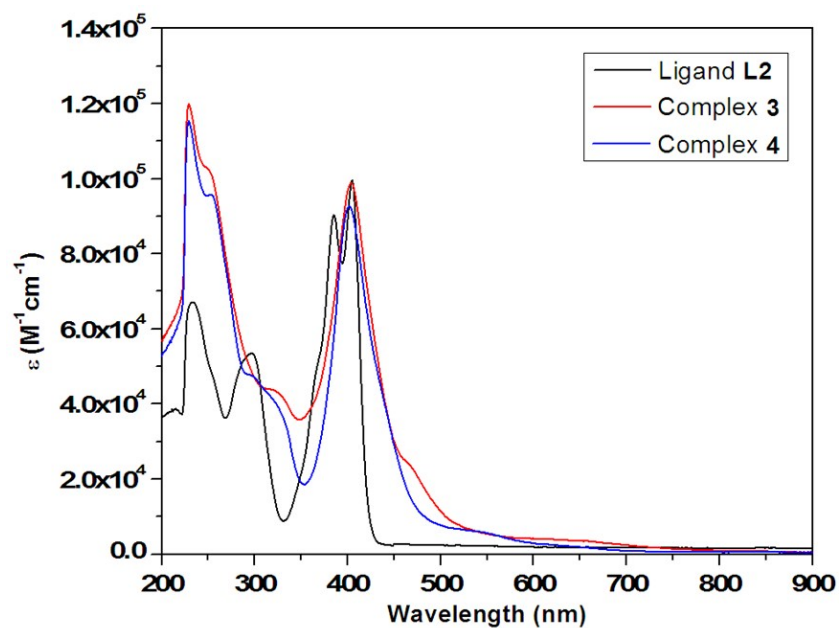

**Figure S17.** UV-Vis spectra of complexes **3** and **4**, compared with ligand (**L2**) in  $\text{CH}_2\text{Cl}_2$  ( $1.5 \times 10^{-5} \text{ M}$ ).

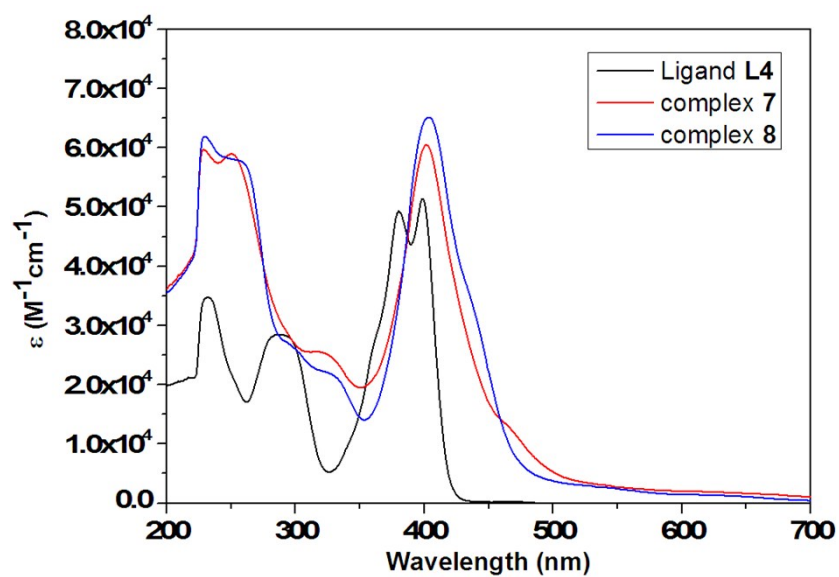

**Figure S18.** UV-Vis spectra of complexes **7** and **8**, compared with ligand (**L4**) in  $\text{CH}_2\text{Cl}_2$  ( $1.5 \times 10^{-5} \text{ M}$ ).



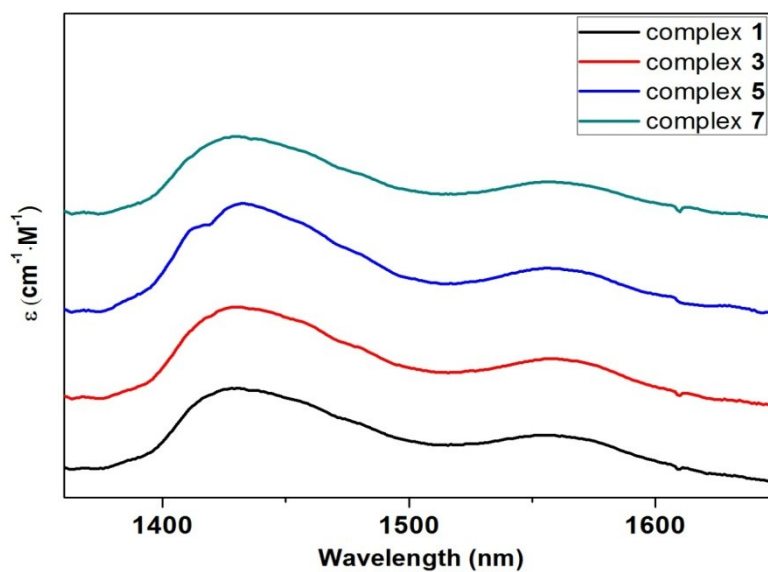

**Figure S19.** Near-IR spectra of complexes **1**, **3**, **5** and **7** in DMF.

**Table S1.** Near-IR spectral data for complexes **1**, **3**, **5** and **7**.

| Complex<br>(in DMF) | Band 1 |                                                  | Band 2 |                                                  |
|---------------------|--------|--------------------------------------------------|--------|--------------------------------------------------|
|                     | nm     | $\epsilon$ (cm <sup>-1</sup> · M <sup>-1</sup> ) | nm     | $\epsilon$ (cm <sup>-1</sup> · M <sup>-1</sup> ) |
| <b>1</b>            | 1431   | $1.80 \times 10^3$                               | 1556   | $1.03 \times 10^3$                               |
| <b>3</b>            | 1431   | $1.65 \times 10^3$                               | 1556   | $8.04 \times 10^2$                               |
| <b>5</b>            | 1433   | $1.87 \times 10^3$                               | 1556   | $7.93 \times 10^2$                               |
| <b>7</b>            | 1431   | $1.48 \times 10^3$                               | 1556   | $7.29 \times 10^2$                               |

## 6. Plot of $\chi_M$ vs. $T$ and $\mu_{\text{eff}}$ vs. $T$ for complexes **1**, **3**, **5** and **7**

Molar magnetic susceptibility data were recorded with a Quantum Design SQUID-VSM system in the range 4-300 K with a 3000 Gauss external magnetic field. The values of  $\mu_{\text{eff}}$  at 300 K, which is close to the value of spin-only ( $\mu_{\text{s.o.}} = 3.87$ ), are 4.10 (for **1**), 4.26 (for **3**), 3.74 (for **5**) and 3.95  $\mu_{\text{eff}}$  (for **7**) and reveal that these complexes possess an  $S = 3/2$  spin configuration.

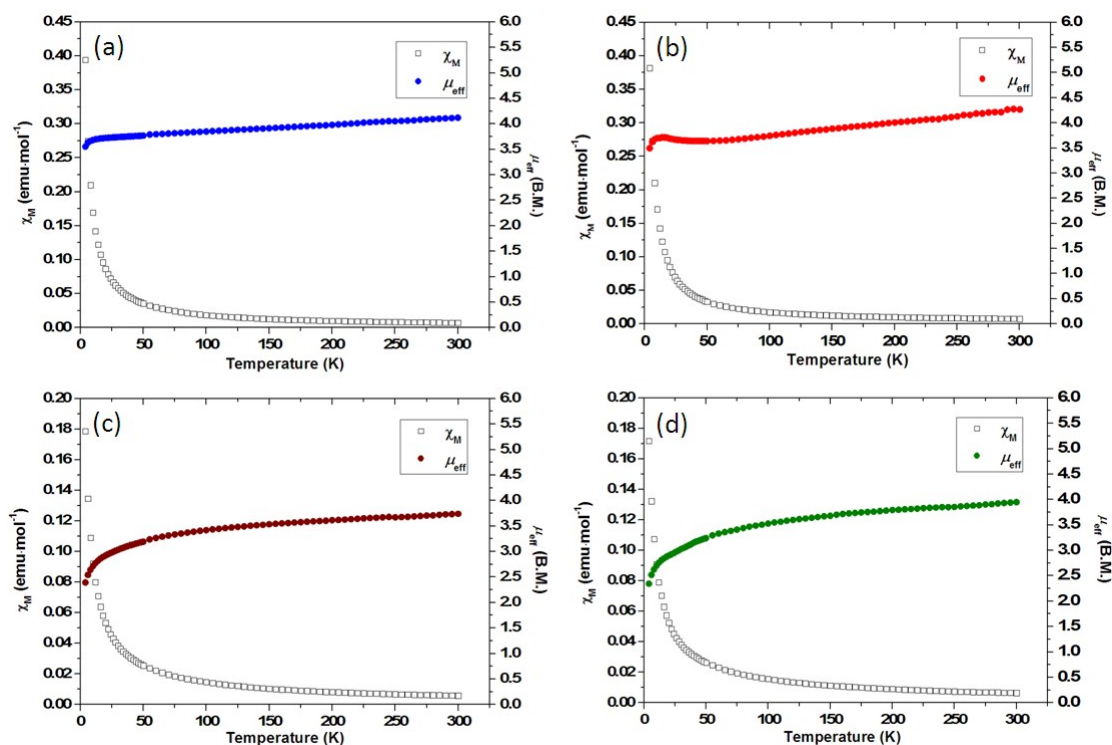

**Figure S20.** Plot of  $\chi_M$  vs.  $T$  and  $\mu_{\text{eff}}$  vs.  $T$  for (a) **1**, (b) **3**, (c) **5** and (d) **7**.

7. CV measurement for complexes **2**, **4** and **8** in CH<sub>2</sub>Cl<sub>2</sub> containing 0.1 M TBAP with a scan rate of 100 mV·s<sup>-1</sup>

Cyclic voltammetry was recorded with a home-made three-electrode cell equipped with a BAS glassy carbon (0.07 cm<sup>2</sup>) disk as the working electrode, a platinum wire as the auxiliary electrode, and a home-made Ag/AgCl (saturated) as the reference electrode. There are four reversible redox waves for **2**, **4** and **8**. Complex **6** is slightly soluble in DCM, resulting in the peak is not very clearly when we perform the CV measurement.

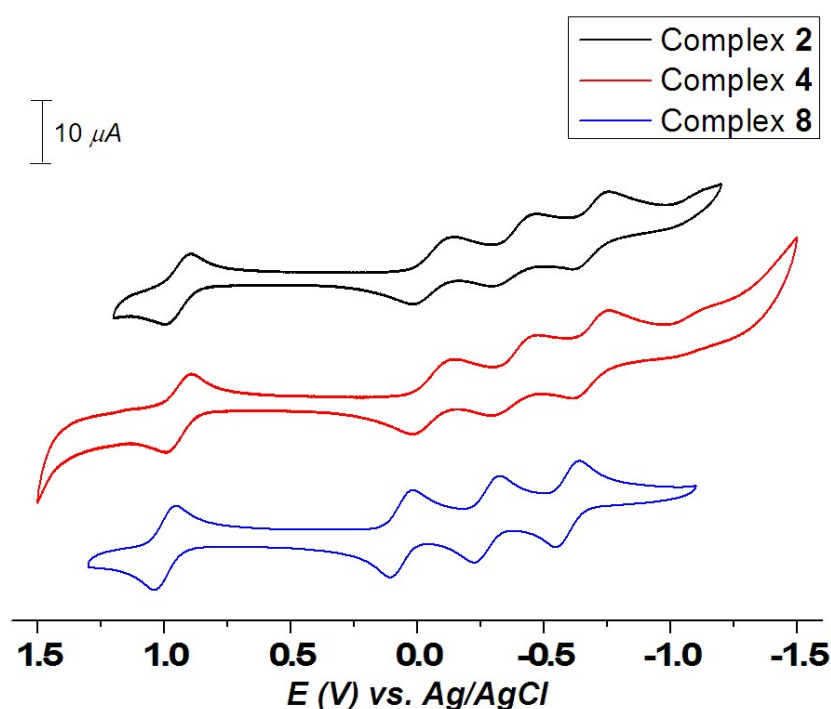

**Figure S21.** The cyclic voltammograms of **2**, **4** and **8** in CH<sub>2</sub>Cl<sub>2</sub> containing 0.1 M TBAP with a scan rate of 100 mV·s<sup>-1</sup>. Top: complex **2**, black line; Middle: complex **4**, red line; Bottom: complex **8**, blue line.

## 8. EPR spectra for complexes 1–3 at 4 K

The EPR measurements of complexes **1**–**3** were performed at 4 K. The best fit spectra parameters of complex **1** are  $g = 2.03$ ,  $2.03$  and  $2.21$  for  $S = 1/2$  and  $g = 2.09$ ,  $D = 1.00(1)$ ,  $E = -0.027(2)$   $\text{cm}^{-1}$  for  $S = 3/2$ . The parameters of complex **3** are  $g = 2.02$ ,  $2.02$ , and  $2.23$  for  $S = 1/2$  and  $g = 2.09$ ,  $D = 1.00(1)$ ,  $E = -0.027(2)$   $\text{cm}^{-1}$  for  $S = 3/2$ . Note that the  $D$  and  $E$  values of complexes **1** and **3** are greater than those of **5** and **7** (see main text) which are reasonable in views of the mixed-valence site being localized at the terminal Ni(1)-Ni(2) (relatively asymmetric) in **1** and **3** in comparison with more symmetric Ni(2)-Ni(3) site (with respect to the center of the penta-metal string) in **5** and **7**.

The spectra of **2** exhibits no obvious signals at 4, 10 and 25 K, which shows the ground state is  $S = 0$  and the energy gap between the ground state and the excited state ( $S = 2$ ) is much greater the thermal energy ( $J = -13.59$   $\text{cm}^{-1}$ ) for complex **2**.

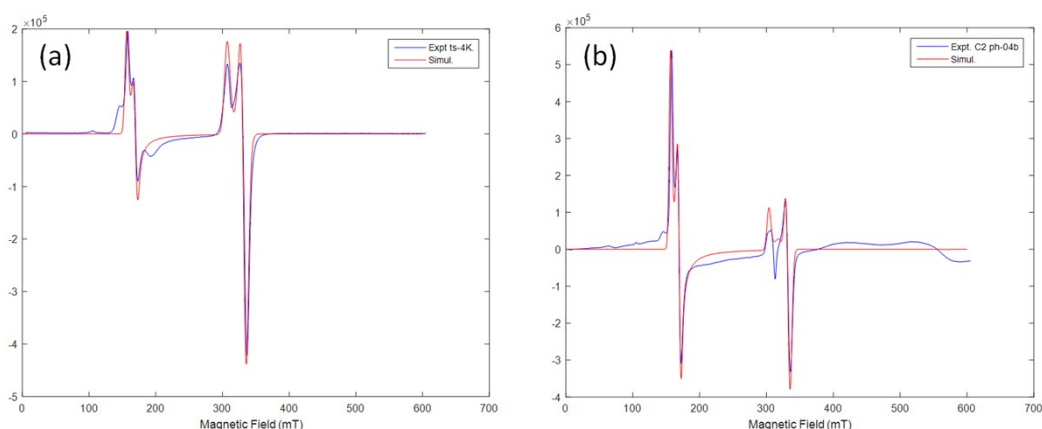

**Figure S22.** The experimental and simulated EPR spectra at 4 K, (a) complex **1** and (b) complex **3**, experiment (in blue); simulation (in red).

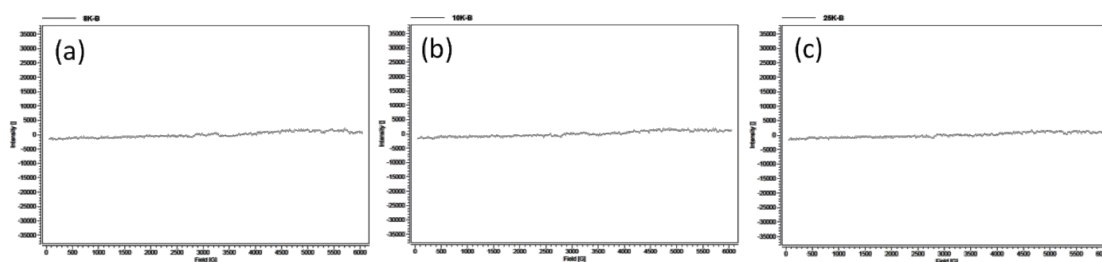

**Figure S23.** The experimental EPR spectra of complex **2** at (a) 4 K, (b) 10 K

and (c) 25 K, respectively.

## 9. Crystal data for complexes 1–8

Author's response to the IUCr checkcif file: for complex **5**, Alert level B is due to the DCM solvent disorder. For complex **1**, there exist a disorder between Cl<sup>-</sup> ion and PF<sub>6</sub><sup>-</sup> anion, whose occupancy are 0.769 (PF<sub>6</sub><sup>-</sup>) and 0.231 (Cl<sup>-</sup>).

**Table S2.** Crystal data for complexes **1–4**.

|                                                                                         | <b>1·2(CH<sub>2</sub>Cl<sub>2</sub>)</b><br>(C <sub>3</sub> H <sub>7</sub> NO)                   | <b>2·3(CH<sub>3</sub>OH)</b>                                                   | <b>3·5.5(CH<sub>2</sub>Cl<sub>2</sub>)</b>                                       | <b>4·8(CH<sub>2</sub>Cl<sub>2</sub>)</b>                                                         |
|-----------------------------------------------------------------------------------------|--------------------------------------------------------------------------------------------------|--------------------------------------------------------------------------------|----------------------------------------------------------------------------------|--------------------------------------------------------------------------------------------------|
| Empirical Formula                                                                       | C <sub>85</sub> H <sub>71</sub> N <sub>21</sub> O <sub>9</sub> S <sub>4</sub> Cl <sub>4.23</sub> | C <sub>83</sub> H <sub>76</sub> N <sub>20</sub> O <sub>13</sub> S <sub>4</sub> | C <sub>109.5</sub> H <sub>87</sub> N <sub>20</sub> O <sub>8</sub> S <sub>4</sub> | C <sub>112</sub> H <sub>92</sub> N <sub>20</sub> O <sub>8</sub> S <sub>4</sub> Cl <sub>1.6</sub> |
| Formula weight                                                                          | Ni <sub>5</sub> P <sub>0.77</sub> F <sub>4.61</sub>                                              | Ni <sub>5</sub> P <sub>2</sub> F <sub>12</sub>                                 | Cl <sub>11</sub> Ni <sub>5</sub> PF <sub>6</sub>                                 | Ni <sub>5</sub> P <sub>2</sub> F <sub>12</sub>                                                   |
| Crystal color                                                                           | 2213.85                                                                                          | 2273.27                                                                        | 2767.70                                                                          | 3124.96                                                                                          |
| Crystal system                                                                          | light-brown                                                                                      | red-brown                                                                      | light-brown                                                                      | red-brown                                                                                        |
| Space group                                                                             | Monoclinic                                                                                       | Tetragonal                                                                     | Triclinic                                                                        | Triclinic                                                                                        |
| <i>a</i> [Å]                                                                            | <i>P</i> 2 <sub>1</sub> / <i>c</i>                                                               | <i>I</i> 4 <sub>1</sub> / <i>acd</i>                                           | <i>P</i> -1                                                                      | <i>P</i> -1                                                                                      |
| <i>b</i> [Å]                                                                            | 18.1215(7)                                                                                       | 27.2637(6)                                                                     | 16.4220(7)                                                                       | 14.6531(5)                                                                                       |
| <i>c</i> [Å]                                                                            | 17.4460(6)                                                                                       | 27.2637(6)                                                                     | 16.8719(8)                                                                       | 18.6083(6)                                                                                       |
| <i>α</i> [°]                                                                            | 31.4395(11)                                                                                      | 50.6630(10)                                                                    | 22.4552(10)                                                                      | 23.8981(6)                                                                                       |
| <i>β</i> [°]                                                                            | 90                                                                                               | 90                                                                             | 73.6370(14)                                                                      | 86.3807(10)                                                                                      |
| <i>γ</i> [°]                                                                            | 98.5260(10)                                                                                      | 90                                                                             | 76.3465(16)                                                                      | 88.3058(10)                                                                                      |
| <i>V</i> [Å <sup>3</sup> ]                                                              | 90                                                                                               | 90                                                                             | 76.0990(18)                                                                      | 71.2244(11)                                                                                      |
| <i>Z</i>                                                                                | 9829.7(6)                                                                                        | 37658.3(18)                                                                    | 5699.4(4)                                                                        | 6156.9(3)                                                                                        |
| <i>T</i> [K]                                                                            | 4                                                                                                | 16                                                                             | 2                                                                                | 2                                                                                                |
| <i>ρ</i> <sub>calcd</sub> [Mgm <sup>-3</sup> ]                                          | 150(2)                                                                                           | 150(2)                                                                         | 150(2)                                                                           | 150(2)                                                                                           |
| <i>R</i> <sub>1</sub> <sup>[a]</sup> / <i>wR</i> <sub>2</sub> <sup>[b]</sup>            | 1.496                                                                                            | 1.595                                                                          | 1.613                                                                            | 1.686                                                                                            |
| [ <i>I</i> > 2σ( <i>I</i> )]                                                            | 0.0580, 0.1575                                                                                   | 0.0551, 0.1487                                                                 | 0.0696, 0.1867                                                                   | 0.0535, 0.1314                                                                                   |
| <i>R</i> <sub>1</sub> <sup>[a]</sup> / <i>wR</i> <sub>2</sub> <sup>[b]</sup> (all data) | 0.0742, 0.1766                                                                                   | 0.0787, 0.1640                                                                 | 0.0927, 0.2046                                                                   | 0.0682, 0.1440                                                                                   |
| GOF                                                                                     | 1.027                                                                                            | 1.045                                                                          | 1.034                                                                            | 1.017                                                                                            |

[a]  $R_1 = \sum |F_o| - |F_c| / \sum |F_o|$ . [b]  $wR_2 = [\sum (w(F_o^2 - F_c^2)^2) / \sum (w(F_o^2)^2)]^{1/2}$ , in which  $w = 1/\sigma^2(F_o^2) + (aP)^2 + bP$ ,  $P = (F_o^2 + 2F_c^2)/3$ .



**Table S3.** Crystal data for complexes **5–8**.

|                                                                                              | <b>5</b> ·3(CH <sub>2</sub> Cl <sub>2</sub> )·<br>2(C <sub>3</sub> H <sub>7</sub> NO) | <b>6</b> ·(CH <sub>2</sub> Cl <sub>2</sub> )                   | <b>7</b> ·5.5(C <sub>2</sub> H <sub>4</sub> Cl <sub>2</sub> )  | <b>8</b> ·6(CH <sub>2</sub> Cl <sub>2</sub> )                                |
|----------------------------------------------------------------------------------------------|---------------------------------------------------------------------------------------|----------------------------------------------------------------|----------------------------------------------------------------|------------------------------------------------------------------------------|
| Empirical                                                                                    | C <sub>65</sub> H <sub>64</sub> Cl <sub>6</sub> F <sub>6</sub> N <sub>22</sub>        | C <sub>59</sub> H <sub>46</sub> Cl <sub>2</sub> F <sub>6</sub> | C <sub>91</sub> H <sub>83</sub> Cl <sub>8</sub> F <sub>6</sub> | C <sub>86</sub> H <sub>72</sub> Cl <sub>12</sub> F <sub>12</sub>             |
| Formula                                                                                      | Ni <sub>5</sub> O <sub>10</sub> PS <sub>4</sub>                                       | N <sub>20</sub> Ni <sub>5</sub> O <sub>14</sub> S <sub>6</sub> | N <sub>20</sub> Ni <sub>5</sub> O <sub>8</sub> PS <sub>4</sub> | N <sub>20</sub> Ni <sub>5</sub> O <sub>8</sub> P <sub>2</sub> S <sub>4</sub> |
| Formula weight                                                                               | 2089.84                                                                               | 1929.97                                                        | 2435.13                                                        | 2650.76                                                                      |
| Crystal color                                                                                | light-brown                                                                           | red-brown                                                      | light-brown                                                    | red-brown                                                                    |
| Crystal system                                                                               | Triclinic                                                                             | Monoclinic                                                     | Monoclinic                                                     | Monoclinic                                                                   |
| Space group                                                                                  | <i>P</i> -1                                                                           | <i>C</i> 2/ <i>c</i>                                           | <i>P</i> 2 <sub>1</sub> / <i>n</i>                             | <i>C</i> 2/ <i>c</i>                                                         |
| <i>a</i> [Å]                                                                                 | 14.1494(4)                                                                            | 25.0742(9)                                                     | 16.2704(5)                                                     | 32.1417(7)                                                                   |
| <i>b</i> [Å]                                                                                 | 17.0242(6)                                                                            | 14.4767(6)                                                     | 37.9133(11)                                                    | 13.4697(3)                                                                   |
| <i>c</i> [Å]                                                                                 | 17.9497(6)                                                                            | 18.9389(7)                                                     | 16.4754(5)                                                     | 23.6404(5)                                                                   |
| $\alpha$ [°]                                                                                 | 76.2023(16)                                                                           | 90                                                             | 90                                                             | 90                                                                           |
| $\beta$ [°]                                                                                  | 72.4156(14)                                                                           | 90.625(2)                                                      | 104.9136(8)                                                    | 96.7840(6)                                                                   |
| $\gamma$ [°]                                                                                 | 78.5677(14)                                                                           | 90                                                             | 90                                                             | 90                                                                           |
| <i>V</i> [Å <sup>3</sup> ]                                                                   | 3965.4(2)                                                                             | 6874.3(5)                                                      | 9820.7(5)                                                      | 10163.2(4)                                                                   |
| <i>Z</i>                                                                                     | 2                                                                                     | 4                                                              | 4                                                              | 4                                                                            |
| <i>T</i> [K]                                                                                 | 150(2)                                                                                | 150(2)                                                         | 150(2)                                                         | 150(2)                                                                       |
| $\rho_{\text{calcd}}$ [Mgm <sup>-3</sup> ]                                                   | 1.750                                                                                 | 1.865                                                          | 1.647                                                          | 1.677                                                                        |
| <i>R</i> 1 <sup>[a]</sup> / <i>wR</i> 2 <sup>[b]</sup> [ <i>I</i> > 2 $\sigma$ ( <i>I</i> )] | 0.0879/ 0.2646                                                                        | 0.1066/ 0.2990                                                 | 0.0713/ 0.1545                                                 | 0.0690 / 0.1898                                                              |
| <i>R</i> 1 <sup>[a]</sup> / <i>wR</i> 2 <sup>[b]</sup> (all data)                            | 0.1013/ 0.2859                                                                        | 0.1452/ 0.3373                                                 | 0.1095/ 0.1717                                                 | 0.0930/ 0.2188                                                               |
| GOF                                                                                          | 1.036                                                                                 | 1.206                                                          | 1.068                                                          | 1.047                                                                        |

[a]  $R1 = \sum |F_o| - |F_c| / \sum |F_o|$ . [b]  $wR2 = [\sum [w(F_o^2 - F_c^2)^2] / \sum [w(F_o^2)^2]]^{1/2}$ , in which  $w = 1/\sigma^2(F_o^2) + (aP)^2 + bP$ ,  $P = (F_o^2 + 2F_c^2)/3$ .

## Reference

1. S. Wagan and S. L. Buchwald, *J. Org. Chem.*, 1996, **61**, 7240-7241.
2. Mixed Valence Compounds, ed. D. M. Brown, D. Reidel, Dordrecht, Holland, 1980.
